# Supplementary material for: Internal electric fields in asymmetric single-layer lattices for enhancing photocatalytic solar-to-hydrogen efficiency
Source: Royal Society of Chemistry journal article supplement (doi:10.1039/d3ta03824f), 2023-01-01
Supplement: d3ta03824f1.pdf [file d3ta03824f1.pdf]

## Supplementary Information

### Internal Electric Fields in Asymmetric Single-layer Lattices for Enhancing Photocatalytic Solar-to-Hydrogen Efficiency

Yu-Liang Liu<sup>a,b</sup>, Yongfeng Wan<sup>a</sup>, Bo Li<sup>a</sup>, Chuan-Lu Yang<sup>b,\*</sup>, Xingshuai Lv<sup>c</sup>, Ying Shi<sup>a,\*</sup>

<sup>a</sup> Institute of Atomic and Molecular Physics, Jilin University, 130012 Changchun, China

<sup>b</sup> School of Physics and Optoelectronic Engineering, Ludong University, 26425 Yantai, China

<sup>c</sup> Institute of Applied Physics and Materials Engineering, University of Macau, Macao SAR 999078, China

\*Corresponding author. Email: [shi\\_ying@jlu.edu.cn](mailto:shi_ying@jlu.edu.cn) (Y. Shi); [ycl@ldu.edu.cn](mailto:ycl@ldu.edu.cn) (C.L. Yang)

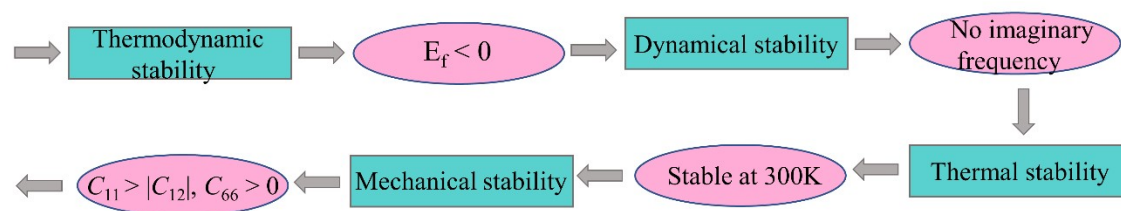

**Fig. S1** The flow diagram of stability evaluation.

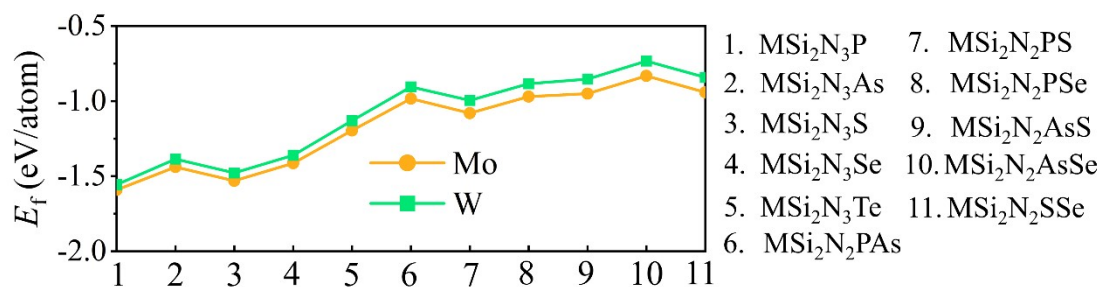

**Fig. S2** The enthalpies of formation  $E_f$  (eV/atom) of 22 selected  $MSi_2N_2XY$  monolayers.

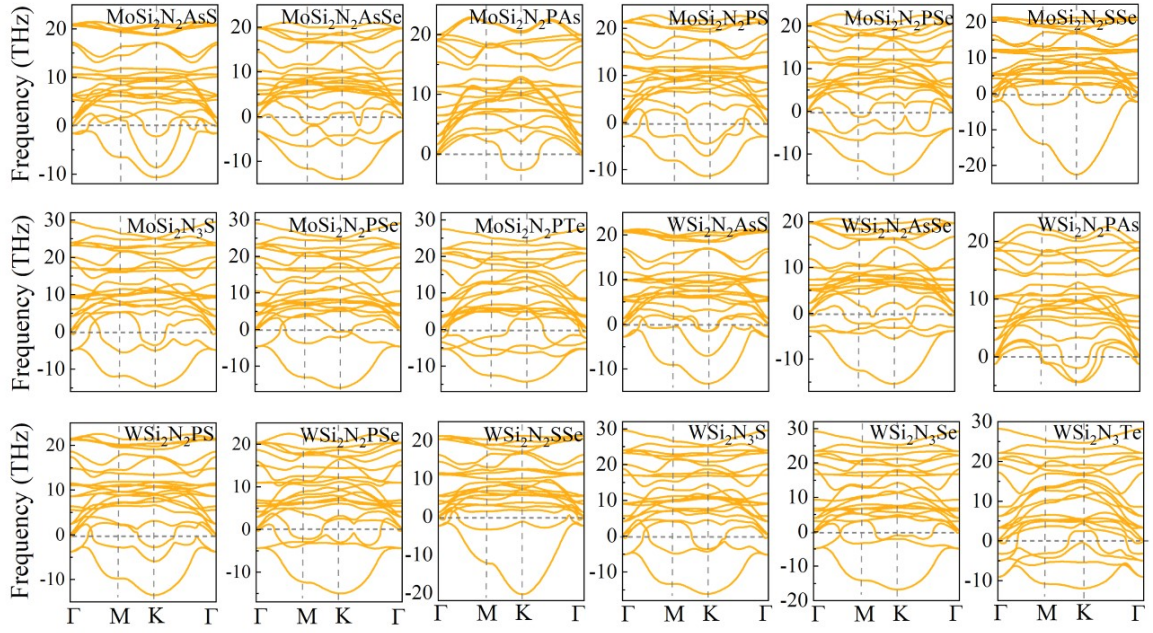

**Fig. S3** The phonon spectrum of 18 unstable  $MSi_2N_2XY$  monolayers.

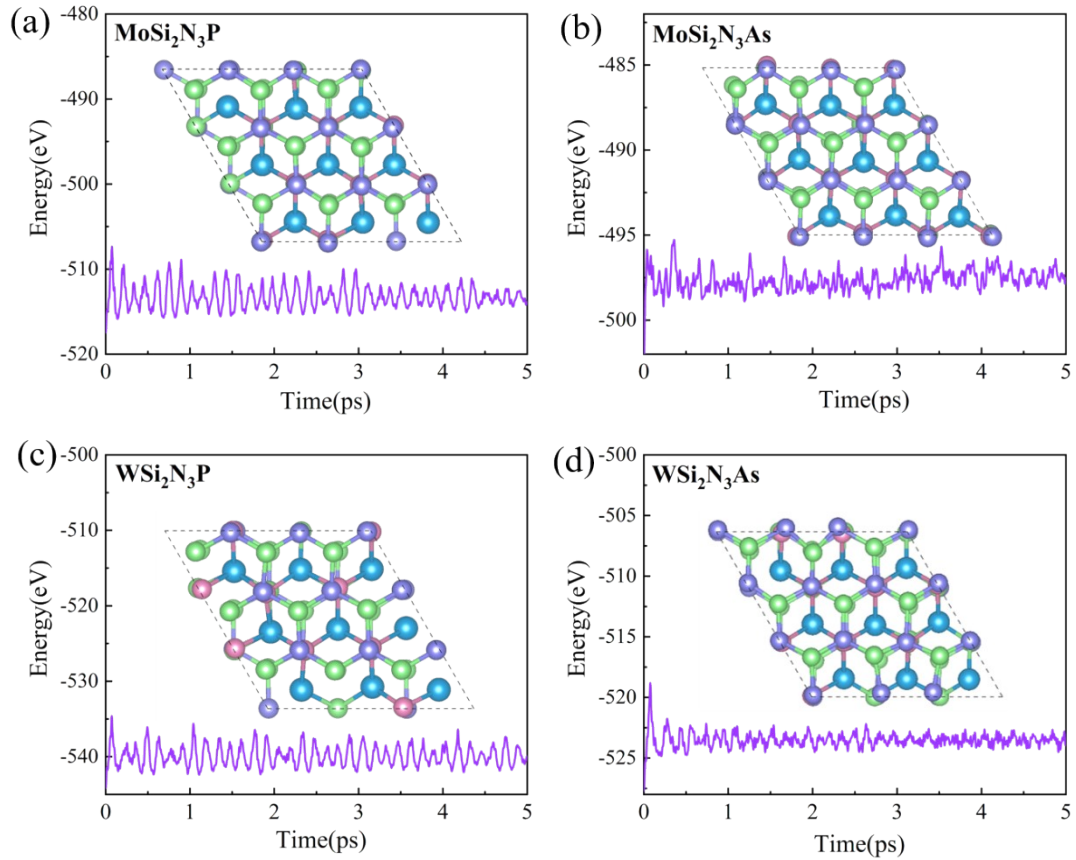

**Fig. S4** The ab initio molecular dynamics (AIMD) simulations at 500 K for (a)  $MoSi_2N_3P$ , (b)  $MoSi_2N_3As$ , (c)  $WSi_2N_3P$  and (d)  $WSi_2N_3As$  monolayers, respectively.

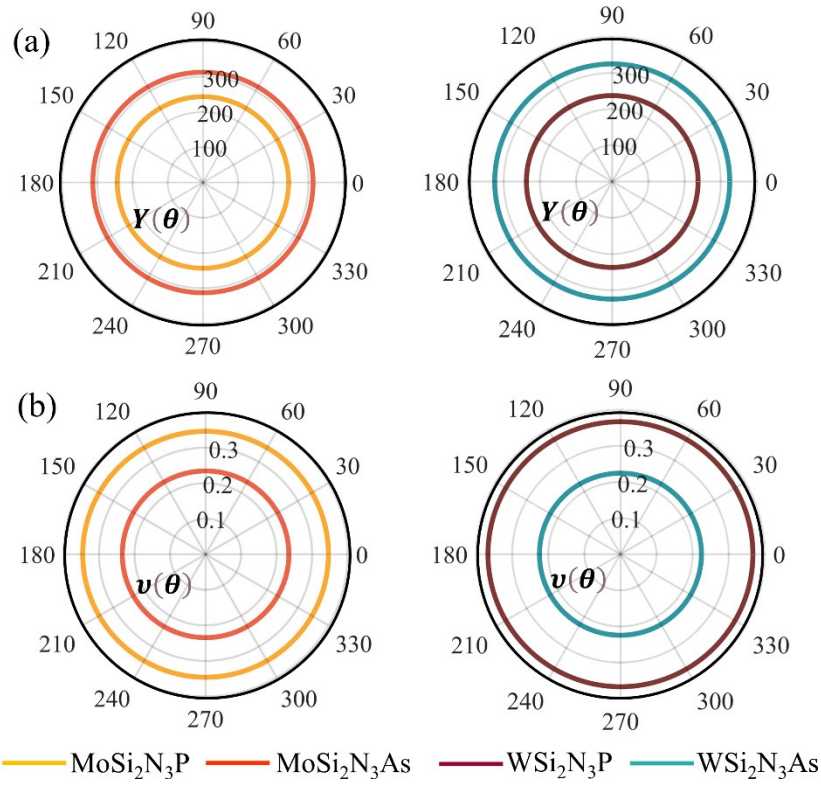

**Fig. S5** Polar diagrams of (a) Young's modulus  $Y(\theta)$  and (b) Poisson's ratio  $\nu(\theta)$  for MoSi<sub>2</sub>N<sub>3</sub>P, MoSi<sub>2</sub>N<sub>3</sub>As, WSi<sub>2</sub>N<sub>3</sub>P and WSi<sub>2</sub>N<sub>3</sub>As monolayers.

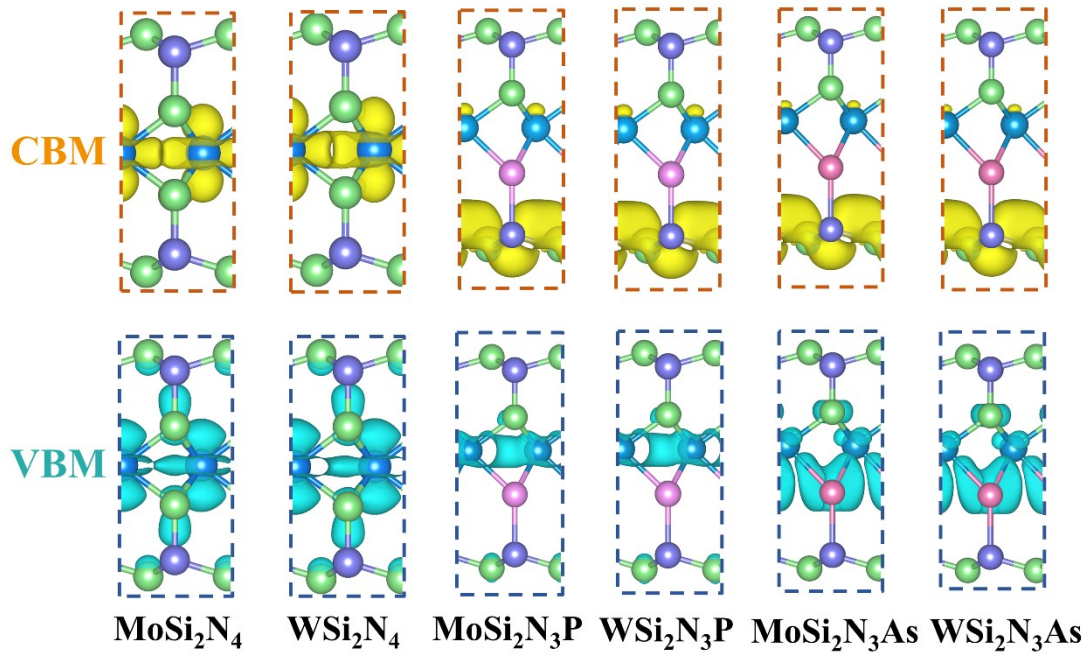

**Fig. S6** Band-decomposed charge density of the CBM and VBM for MSi<sub>2</sub>N<sub>4</sub>, MSi<sub>2</sub>N<sub>3</sub>P and MSi<sub>2</sub>N<sub>3</sub>As monolayers, respectively.

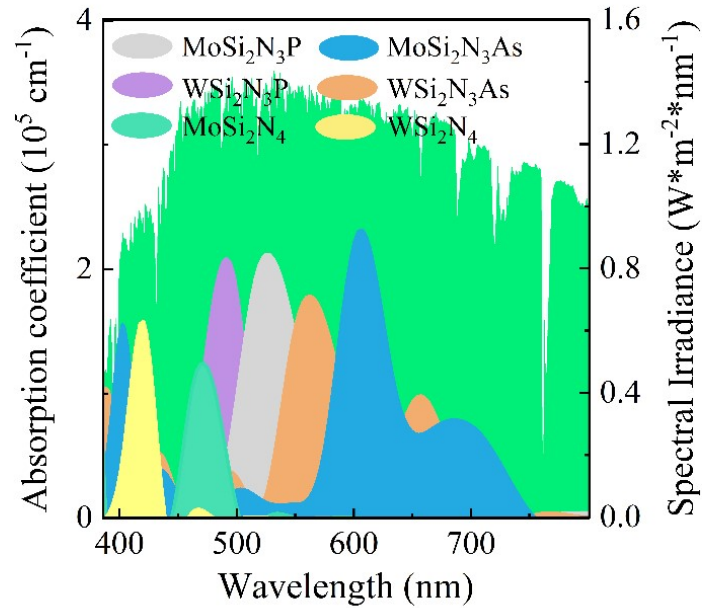

**Fig. S7** The calculated absorption coefficients of  $\text{MSi}_2\text{N}_3\text{Y}$  monolayers and  $\text{MSi}_2\text{N}_4$  monolayers by HSE06 functional.

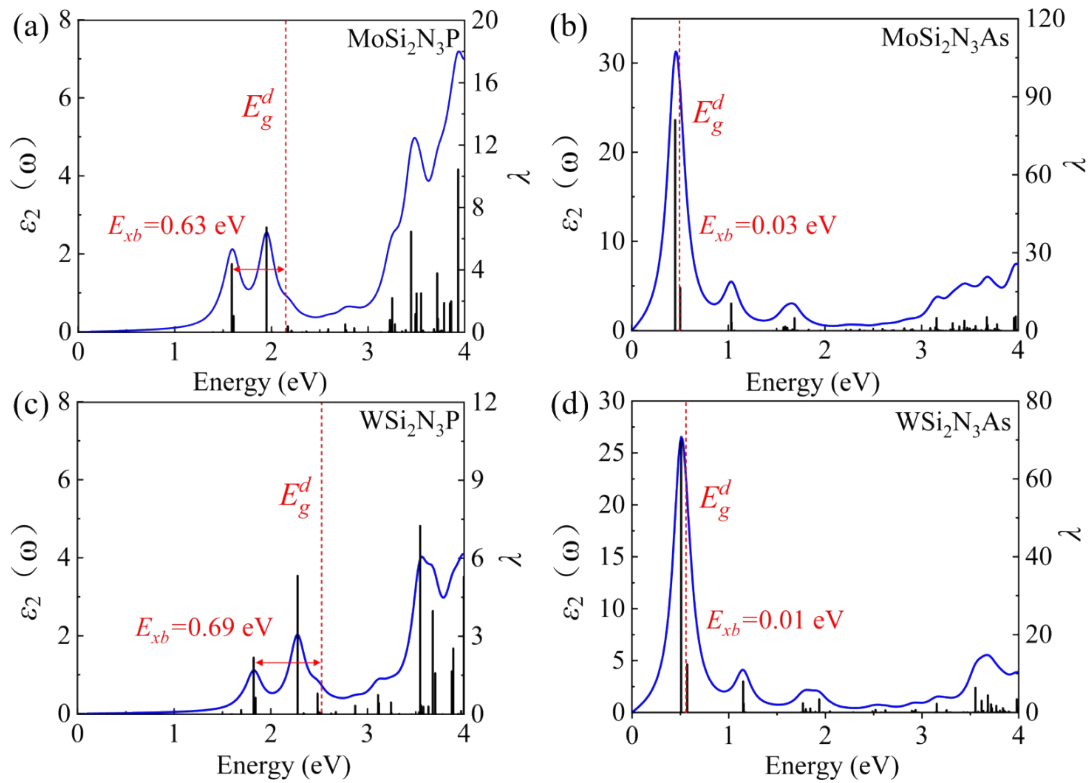

**Fig. S8** (a)-(d) The imaginary dielectric function  $\varepsilon_2$  and the oscillator strength  $\lambda$  as a function of photon energy for  $\text{MSi}_2\text{N}_3\text{Y}$  monolayers. The red line indicates the direct bandgap calculated by GW method.

**Table S1.** The calculated structural properties, including lattice constant ( $a$ ), bond length ( $d_{Si-X/Y}^{out}$  and  $d_{M-X/Y}^{in}$ ), and inner-layer height ( $h_{X-Y}^{in}$ ) for  $MSi_2N_2XY$  monolayers.

| Monolayers     | M  | $a$<br>(Å) | $d_{Si-X}^{out}$<br>(Å) | $d_{Si-Y}^{out}$<br>(Å) | $d_{M-X}^{in}$<br>(Å) | $d_{M-Y}^{in}$<br>(Å) | $h_{X-Y}^{in}$<br>(Å) | Distortion<br>(Y/N) |
|----------------|----|------------|-------------------------|-------------------------|-----------------------|-----------------------|-----------------------|---------------------|
| $MSi_2N_4$     | Mo | 2.901      | 1.751                   | 1.751                   | 2.087                 | 2.087                 | 2.490                 | N                   |
|                | W  | 2.905      | 1.752                   | 1.752                   | 2.094                 | 2.094                 | 2.506                 | N                   |
| $MSi_2N_3P$    | Mo | 2.967      | 1.745                   | 2.227                   | 2.107                 | 2.358                 | 2.846                 | N                   |
|                | W  | 2.974      | 1.746                   | 2.222                   | 2.117                 | 2.367                 | 2.868                 | N                   |
| $MSi_2N_3As$   | Mo | 2.982      | 1.746                   | 2.337                   | 2.106                 | 2.463                 | 2.973                 | N                   |
|                | W  | 2.988      | 1.747                   | 2.331                   | 2.116                 | 2.472                 | 2.996                 | N                   |
| $MSi_2N_3S$    | Mo | 2.938      | 1.748                   | 2.239                   | 2.094                 | 2.429                 | 2.966                 | N                   |
|                | W  | 2.937      | 1.748                   | 2.269                   | 2.102                 | 2.432                 | 2.986                 | N                   |
| $MSi_2N_3Se$   | Mo | 2.959      | 1.749                   | 2.446                   | 2.095                 | 2.542                 | 3.094                 | N                   |
|                | W  | 2.959      | 1.747                   | 2.516                   | 2.103                 | 2.540                 | 3.106                 | N                   |
| $MSi_2N_3Te$   | Mo | 3.000      | 1.749                   | 2.695                   | 2.104                 | 2.726                 | 3.298                 | N                   |
|                | W  | 3.003      | 1.749                   | 2.735                   | 2.114                 | 2.737                 | 3.327                 | N                   |
| $MSi_2N_2PAs$  | Mo | 3.051      | 2.230                   | 2.353                   | 2.363                 | 2.488                 | 3.333                 | N                   |
|                | W  | 3.053      | 2.229                   | 2.353                   | 2.375                 | 2.499                 | 3.363                 | N                   |
| $MSi_2N_2PS$   | Mo | 3.007      | 2.248                   | 2.200                   | 2.363                 | 2.448                 | 3.329                 | N                   |
|                | W  | 3.011      | 2.252                   | 2.216                   | 2.376                 | 2.449                 | 3.344                 | N                   |
| $MSi_2N_2PSe$  | Mo | 3.034      | 2.241                   | 2.396                   | 2.345                 | 2.579                 | 3.452                 | N                   |
|                | W  | 3.040      | 2.245                   | 2.424                   | 2.361                 | 2.584                 | 3.475                 | N                   |
| $MSi_2N_2PTe$  | Mo | 3.072      | 2.237                   | 3.854                   | 2.351                 | 2.751                 | 3.646                 | Y                   |
|                | W  | 3.091      | 2.236                   | 3.881                   | 2.366                 | 2.736                 | 3.628                 | Y                   |
| $MSi_2N_2AsS$  | Mo | 3.025      | 2.371                   | 2.198                   | 2.493                 | 2.405                 | 3.432                 | N                   |
|                | W  | 3.032      | 2.375                   | 2.218                   | 2.501                 | 2.418                 | 3.453                 | N                   |
| $MSi_2N_2AsSe$ | Mo | 3.055      | 2.367                   | 2.398                   | 2.463                 | 2.543                 | 3.551                 | N                   |
|                | W  | 3.059      | 2.370                   | 2.432                   | 2.476                 | 2.552                 | 3.578                 | N                   |
| $MSi_2N_2AsTe$ | Mo | 3.092      | 2.363                   | 3.871                   | 2.460                 | 2.723                 | 3.749                 | Y                   |
|                | W  | 3.028      | 2.379                   | 2.760                   | 2.452                 | 3.150                 | 4.339                 | Y                   |
| $MSi_2N_2SSe$  | Mo | 3.023      | 2.217                   | 2.440                   | 2.327                 | 2.637                 | 3.515                 | N                   |
|                | W  | 3.021      | 2.237                   | 2.485                   | 2.355                 | 2.619                 | 3.536                 | N                   |
| $MSi_2N_2STe$  | Mo | 3.072      | 2.199                   | 3.743                   | 2.348                 | 2.776                 | 3.675                 | Y                   |
|                | W  | 3.075      | 2.218                   | 3.735                   | 2.372                 | 2.768                 | 3.697                 | Y                   |
| $MSi_2N_2SeTe$ | Mo | 3.098      | 2.387                   | 3.619                   | 2.490                 | 2.719                 | 3.780                 | Y                   |
|                | W  | 3.100      | 2.412                   | 3.799                   | 2.515                 | 2.729                 | 3.826                 | Y                   |



For a mechanically stable material, the elastic constants should fulfill the Born-Huang stability criteria<sup>1</sup>:  $C_{11} > |C_{12}|$ ,  $C_{11}C_{22} - C_{12}^2 > 0$ ,  $C_{66} > 0$ . Considering that Janus MoSi<sub>2</sub>N<sub>3</sub>P belongs to C<sub>3v</sub> point group, thus  $C_{11} = C_{22}$  and  $C_{66} = 0.5(C_{11} - C_{12})$ , the criterion turns out to be only  $C_{11} > |C_{12}|$ . As shown in Table S3, the calculated  $C_{11}$  is larger than  $C_{12}$  suggesting that four MoSi<sub>2</sub>N<sub>3</sub>Y monolayers are mechanically stable. To evaluate the in-plane stiffness, we calculated Young's modulus  $Y(\theta)$  and Poisson's ratio  $\nu(\theta)$  along the in-plane  $\theta$ , which is given as follow:

$$Y(\theta) = \frac{C_{11}C_{22} - C_{12}^2}{C_{11} \sin^4\theta + A \sin^2\theta \cos^2\theta + C_{22} \cos^4\theta} \quad (1)$$

$$\nu(\theta) = \frac{C_{12} \sin^4\theta - B \sin^2\theta \cos^2\theta + C_{12} \cos^4\theta}{C_{11} \sin^4\theta + A \sin^2\theta \cos^2\theta + C_{22} \cos^4\theta} \quad (2)$$

where  $A = (C_{11}C_{22} - C_{12}^2)/C_{66} - 2C_{12}$  and  $B = C_{11} + C_{22} - (C_{11}C_{22} - C_{12}^2)/C_{66}$ .

**Table S2.** The obtained in-plane elastic constants  $C_{11}$ ,  $C_{22}$ ,  $C_{12}$  and  $C_{66}$  of four monolayers.

| Monolayers                          | $C_{11}$ (N/m) | $C_{22}$ (N/m) | $C_{12}$ (N/m) | $C_{66}$ (N/m) |
|-------------------------------------|----------------|----------------|----------------|----------------|
| MoSi <sub>2</sub> N <sub>3</sub> P  | 331.0          | 331.0          | 77.6           | 126.7          |
| MoSi <sub>2</sub> N <sub>3</sub> As | 276.4          | 276.4          | 95.6           | 90.4           |
| WSi <sub>2</sub> N <sub>3</sub> P   | 341.8          | 341.8          | 76.7           | 132.5          |
| WSi <sub>2</sub> N <sub>3</sub> As  | 274.1          | 274.1          | 100.6          | 86.8           |

**Table S3.** The calculated band gap at HSE06 level ( $E_g$ ), the potentials of photo-generated electrons/holes ( $U_e/U_h$ ), dipole moments ( $\mu$ ) and electrostatic potential difference ( $\Delta\Phi$ ) for four stable monolayers.

| Monolayers | $E_g$ (eV) | $U_e$ (eV) | $U_h$ (eV) | $\mu$ (Debye) | $\Delta\Phi$ (eV) |
|------------|------------|------------|------------|---------------|-------------------|
|------------|------------|------------|------------|---------------|-------------------|

|                                     |      |      |      |      |      |
|-------------------------------------|------|------|------|------|------|
| MoSi <sub>2</sub> N <sub>3</sub> P  | 0.96 | 1.37 | 1.71 | 0.43 | 2.12 |
| MoSi <sub>2</sub> N <sub>3</sub> As | 0.46 | 1.36 | 1.65 | 0.53 | 2.55 |
| WSi <sub>2</sub> N <sub>3</sub> P   | 0.79 | 1.37 | 1.42 | 0.40 | 2.00 |
| WSi <sub>2</sub> N <sub>3</sub> As  | 0.45 | 1.37 | 1.54 | 0.48 | 2.46 |

### The Gibbs free energy

The change of Gibbs free energy ( $\Delta G$ ) in water splitting reaction is calculated using the method proposed by Nørskovet *et al*<sup>2</sup>. The formula can be expressed as:

$$\Delta G = \Delta E + \Delta E_{ZPE} - T\Delta S \quad (3)$$

where  $\Delta E$  is the adsorption energy,  $\Delta E_{ZPE}$  and  $\Delta S$  are the differences in the zero-point energy and entropy difference between the adsorbed state and corresponding free-standing state, respectively.

$E_{ZPE}$  could be derived after the frequency calculation by

$$E_{ZPE} = \frac{1}{2} \sum hv \quad (4)$$

where  $\nu$  represents the vibrational frequency.

Meanwhile, TS is given by

$$TS = k_b T \left[ \sum_K \ln \left( \frac{1}{1 - e^{-hv/k_b T}} \right) + \sum_K \frac{hv}{k_b T} \left( \frac{1}{e^{-hv/k_b T} - 1} + 1 \right) \right] \quad (5)$$

where  $e$  represents the electron charge,  $h$  represents Planck's constant and  $k_b$  is Boltzmann's constant. Here, T is set to be 298.15K.

The effect of external potential and pH have been taken into account to evaluate the HER and OER activities. The  $\Delta G$  for HER process include two steps, which was expressed as:

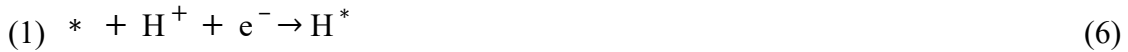

$$\begin{aligned} \Delta G_1 &= G_{H^*} - \frac{1}{2}G_{H_2} - G_* + \Delta G_U + \Delta G_{pH} \\ &= \Delta E_H + \Delta E_{ZPE(H)} - T\Delta S_H + \Delta G_U + \Delta G_{pH} \end{aligned}$$

$$= \Delta G_H \quad (7)$$

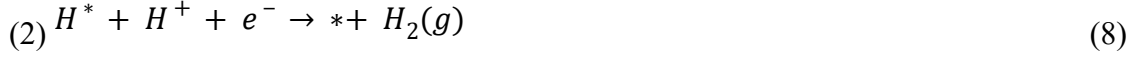

$$\begin{aligned} \Delta G_2 &= G_* + \frac{1}{2}G_{H_2} - G_{H^*} + \Delta G_U + \Delta G_{pH} \\ &= -(\Delta E_H + \Delta E_{ZPE(H)} - T\Delta S_H) + \Delta G_U + \Delta G_{pH} \\ &= -\Delta G_H + 2\Delta G_U + 2\Delta G_{pH} \end{aligned} \quad (9)$$

Meanwhile, the OER can be decomposed into four elementary steps. The  $\Delta G$  for each step was calculated as follows:

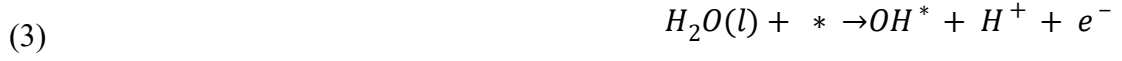

(10)

$$\begin{aligned} \Delta G_3 &= G_{OH^*} + \frac{1}{2}G_{H_2} - G_* - G_{H_2O} + \Delta G_U - \Delta G_{pH} \\ &= \Delta E_{OH} + \Delta E_{ZPE(OH)} - T\Delta S_{OH} + \Delta G_U - \Delta G_{pH} \\ &= \Delta G_{OH} \end{aligned} \quad (11)$$

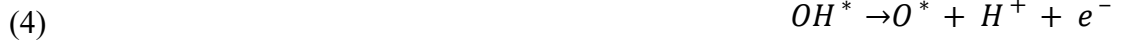

(12)

$$\begin{aligned} \Delta G_4 &= G_{O^*} + \frac{1}{2}G_{H_2} - G_{OH^*} + \Delta G_U - \Delta G_{pH} \\ &= (\Delta E_O + \Delta E_{ZPE(O)} - T\Delta S_O + 2\Delta G_U - 2\Delta G_{pH}) - (\Delta E_{OH} + \Delta E_{ZPE(OH)} - T\Delta S_{OH} \\ &\quad G_U - \Delta G_{pH}) \\ &= \Delta G_O - \Delta G_{OH} \end{aligned} \quad (13)$$

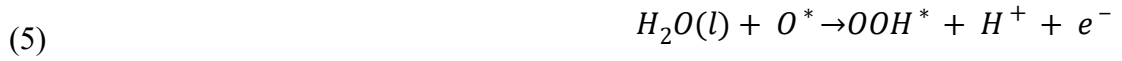

(14)

$$\begin{aligned} \Delta G_5 &= G_{OOH^*} + \frac{1}{2}G_{H_2} - G_{O^*} - G_{H_2O} + \Delta G_U - \Delta G_{pH} \\ &= (\Delta E_{OOH} + \Delta E_{ZPE(OOH)} - T\Delta S_{OOH} + 3\Delta G_U - 3\Delta G_{pH}) - (\Delta E_O + \Delta E_{ZPE(O)} - \\ &\quad 2\Delta G_U - 2\Delta G_{pH}) \end{aligned}$$



$$= \Delta G_{OOH} - \Delta G_O \quad (15)$$

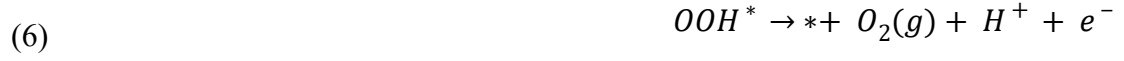

(16)

$$\begin{aligned} \Delta G_6 &= G_* + \frac{1}{2}G_{H_2} + G_{O_2} - G_{OOH^*} + \Delta G_U - \Delta G_{pH} \\ &= (4.92 + 4\Delta G_U - 4\Delta G_{pH}) - (\Delta E_{OOH} + \Delta E_{ZPE(OOH)} - T\Delta S_{OOH} + 3\Delta G_U - 3\Delta G_{pH}) \\ &= (4.92 + 4\Delta G_U - 4\Delta G_{pH}) - \Delta G_{OOH} \end{aligned} \quad (17)$$

where  $\Delta G_U$  ( $\Delta G_U = -eU$ ) denotes extra potential bias provided by an electron in the electrode, where U represents the potential difference from the standard hydrogen electrode potential.  $\Delta G_{pH}$  represents the effect of pH on  $\Delta G$ , which is calculated by  $\Delta G_{pH} = k_b T \times \ln 10 \times \text{pH}$ .

**Table S4.** The adsorption energies  $\Delta E$  (eV) of all adsorbed species on four structures.

| Species | MoSi <sub>2</sub> N <sub>3</sub> P | MoSi <sub>2</sub> N <sub>3</sub> As | WSi <sub>2</sub> N <sub>3</sub> P | WSi <sub>2</sub> N <sub>3</sub> As |
|---------|------------------------------------|-------------------------------------|-----------------------------------|------------------------------------|
| H*      | -0.15                              | -0.84                               | -0.16                             | -0.80                              |
| OH*     | 0.86                               | 0.71                                | 0.80                              | 0.63                               |
| O*      | 3.40                               | 3.17                                | 3.30                              | 2.75                               |
| OOH*    | 4.30                               | 4.14                                | 4.23                              | 4.06                               |

**Table S5.** The zero-point energy  $E_{ZPE}$  (eV) and entropy  $TS$  (eV) of molecules and adsorbates on four structures.

| Species             | MoSi <sub>2</sub> N <sub>3</sub> P | MoSi <sub>2</sub> N <sub>3</sub> As | WSi <sub>2</sub> N <sub>3</sub> P | WSi <sub>2</sub> N <sub>3</sub> As |
|---------------------|------------------------------------|-------------------------------------|-----------------------------------|------------------------------------|
| H <sub>2</sub> O(l) | 0.56/0.67                          | 0.56/0.67                           | 0.56/0.67                         | 0.56/0.67                          |
| H <sub>2</sub> (g)  | 0.27/0.41                          | 0.27/0.41                           | 0.27/0.41                         | 0.27/0.41                          |
| H*                  | 0.24/0.01                          | 0.23/0.01                           | 0.24/0.01                         | 0.23/0.01                          |
| OH*                 | 0.37/0.09                          | 0.37/0.09                           | 0.38/0.09                         | 0.37/0.09                          |
| O*                  | 0.07/0.06                          | 0.07/0.06                           | 0.07/0.06                         | 0.08/0.06                          |
| OOH*                | 0.46/0.17                          | 0.46/0.17                           | 0.45/0.18                         | 0.46/0.16                          |

### Carrier mobility

The carrier mobility of MSi<sub>2</sub>N<sub>3</sub>Y monolayers are calculated based on the deformation potential (DP) approach<sup>3</sup>, which is expressed by the following equation:

$$\mu = \frac{2e\hbar^3 C}{3k_B T |m^*|^2 E_d^2} \quad (\text{S18})$$

where  $e$ ,  $\hbar$  and  $k_B$  are electron charge, the reduced Planck constant and Boltzmann constant,  $T$  means the temperature.  $C$  and  $E_d$  represent the elastic modulus and

deformation potential constant.  $C$  can be obtained from  $C = \frac{1}{S_0} \frac{\partial^2 E}{\partial \varepsilon^2}$ , where  $E_d$  is the total energy of the system under uniaxial strain,  $S_0$  is the area of the system, and  $\varepsilon$  is

the ratio of lattice parameter under the uniaxial strain along  $x$  or  $y$  direction on the rectangle cell and.  $E_d$  is represented by  $E_d = \frac{\partial E_{edge}}{\partial \mathcal{E}}$ , and  $E_{edge}$  is the energy change of band edge under uniaxial strain. At the meantime, the effective mass  $m^*$  is calculated from the following relations:

$$\frac{1}{m^*} = \frac{1}{\hbar^2} \frac{d^2 E(k)}{dk^2}$$

(S19)

where  $k$  is wave vector and  $E(k)$  represents the energy that corresponding to  $k$ .

### Solar-to-hydrogen (STH) efficiency

STH efficiency is estimated by the product of the efficiency of light absorption  $\eta_{abs}$  and carrier utilization  $\eta_{cu}$  using the following expression<sup>4</sup>:

$$\eta_{STH} = \eta_{abs} \times \eta_{cu} \quad (20)$$

The efficiency of light absorption is defined as:

$$\eta_{abs} = \frac{\int_{E_g}^{\infty} P(\hbar\omega) d(\hbar\omega)}{\int_0^{\infty} P(\hbar\omega) d(\hbar\omega)} \quad (21)$$

where  $E_g$  is the band gap of photocatalyst and  $P(\hbar\omega)$  is the AM1.5 solar energy flux at the photon energy  $\hbar\omega$ .

The efficiency of carrier utilization ( $\eta_{cu}$ ) is estimated by

$$\eta_{cu} = \frac{\Delta G_{H_2O} \int_E^{\infty} \frac{P(\hbar\omega)}{\hbar\omega} d(\hbar\omega)}{\int_{E_g}^{\infty} P(\hbar\omega) d(\hbar\omega)} \quad (22)$$

where  $\Delta G_{H_2O}$  is the potential difference for water splitting (1.23 eV) and  $E$  is the energy of photons that can be used for water splitting, which can be defined as

$$E = \begin{cases} E_g, & (\chi(H_2) \geq 0.2, \chi(O_2) \geq 0.6) \\ E_g + 0.2 - \chi(H_2), & (\chi(H_2) < 0.2, \chi(O_2) \geq 0.6) \\ E_g + 0.6 - \chi(O_2), & (\chi(H_2) \geq 0.2, \chi(O_2) < 0.6) \\ E_g + 0.8 - \chi(H_2) - \chi(O_2), & (\chi(H_2) < 0.2, \chi(O_2) < 0.6) \end{cases} \quad (23)$$

where  $\chi(H_2)$  and  $\chi(O_2)$  are the over potentials for HER and OER, respectively. Considering the energy loss during carrier migration between different materials, the required over potentials for HER and OER are assumed to be 0.2 and 0.6 eV, respectively.

The intrinsic electric field does positive work for the electron-hole separation during the process of photocatalytic water splitting. Therefore, this part of work should be added into the total energy, and then the corrected STH efficiency of photocatalytic water splitting for 2D material with vertical intrinsic EF is calculated as

$$\eta'_{STH} = \eta_{STH} \times \frac{\int_0^{\infty} P(\hbar\omega) d(\hbar\omega)}{\Delta\Phi \int_{E_g}^{\infty} \frac{P(\hbar\omega)}{\hbar\omega} d(\hbar\omega) + \int_0^{\infty} P(\hbar\omega) d(\hbar\omega)} \quad (24)$$

where  $\Delta\Phi$  is the vacuum level difference on the two respective surfaces.

**Table S6.** The calculated Over-Potential for HER  $\chi(H_2)$ , Over-Potential for OER  $\chi(O_2)$ , the photons energy ( $E$ ), energy conversion efficiency of light absorption ( $\eta_{abs}$ ), carrier utilization ( $\eta_{cu}$ ), and corrected STH ( $\eta'_{STH}$ ) of four monolayers pH=7.

| Monolayers                          | $\chi(H_2)$ (eV) | $\chi(O_2)$ (eV) | $E$ (eV) | $\eta_{abs}$ (%) | $\eta_{cu}$ (%) | $\eta'_{STH}$ (%) |
|-------------------------------------|------------------|------------------|----------|------------------|-----------------|-------------------|
| MoSi <sub>2</sub> N <sub>3</sub> P  | 0.96             | 0.89             | 0.96     | 91.13            | 70.89           | 30.57             |
| MoSi <sub>2</sub> N <sub>3</sub> As | 0.95             | 0.82             | 0.46     | 99.82            | 78.41           | 29.84             |
| WSi <sub>2</sub> N <sub>3</sub> P   | 0.96             | 0.60             | 0.79     | 95.52            | 74.20           | 32.93             |
| WSi <sub>2</sub> N <sub>3</sub> As  | 0.97             | 0.72             | 0.45     | 99.82            | 78.41           | 30.51             |

## References

1. R. C. Andrew, R. E. Mapasha, A. M. Ukpong, N. Chetty, *Phy. Rev. B* 2012, 85, 125428.
2. J. K. Nørskov, J. Rossmeisl, A. Logadottir, L. Lindqvist, J. R. Kitchin, T. Bligaard, H. Jónsson, *J. Phy. Chem. B* 2004, 108, 17886.
3. J. Bardeen, W. Shockley, *Phys. Rev.* 1950, 80, 72-80.
4. C.F. Fu, J. Sun, Q. Luo, X. Li, W. Hu, J. Yang, *Nano Lett.* 2018, 18, 6312-6317.
